# Supplementary material for: Multiple Transcript Properties Related to Translation Affect mRNA Degradation Rates in Saccharomyces cerevisiae
Source: PubMed Central journal article supplement (PMC5100846; doi:10.1534/g3.116.032276), 2016-09-13
Supplement: supp_g3.116.032276_FigureS1.pdf [file supp_g3.116.032276_FigureS1.pdf]

**Neymotin**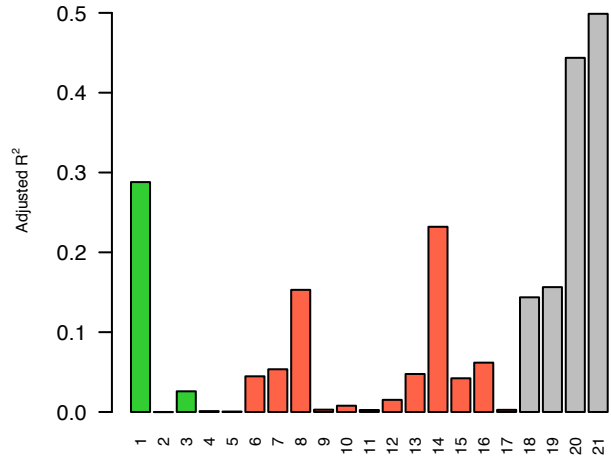**Miller**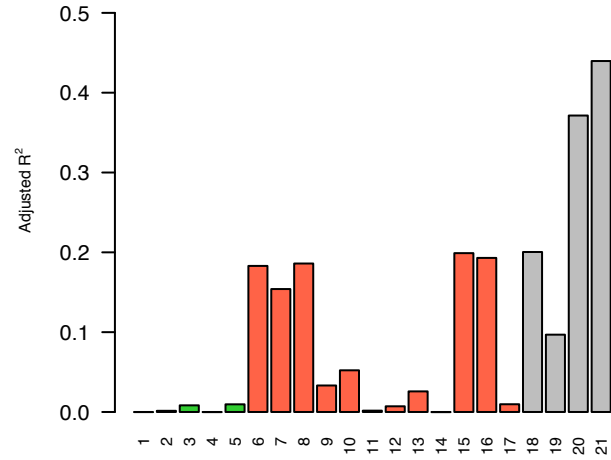**Munchel**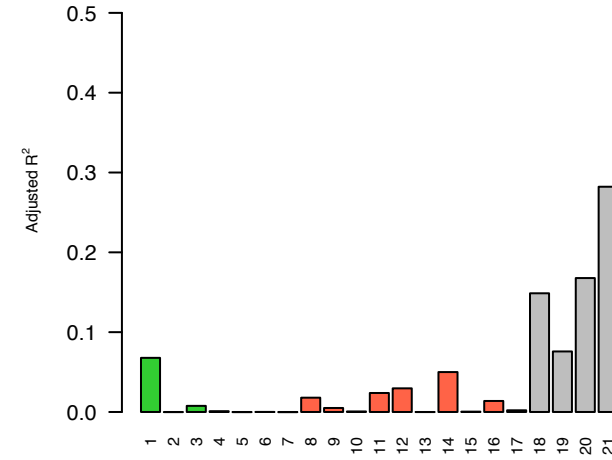**García-Martínez**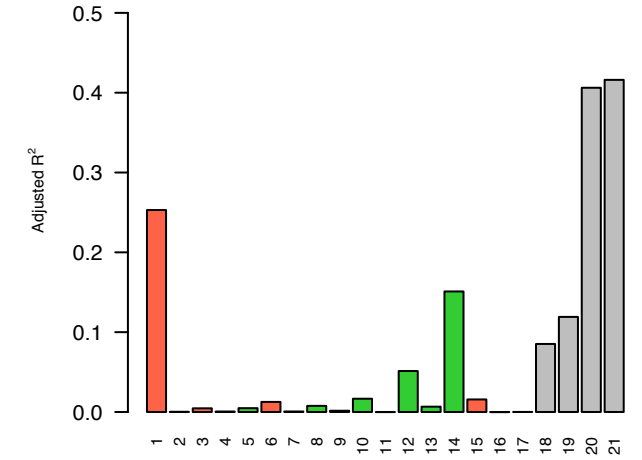**Wang**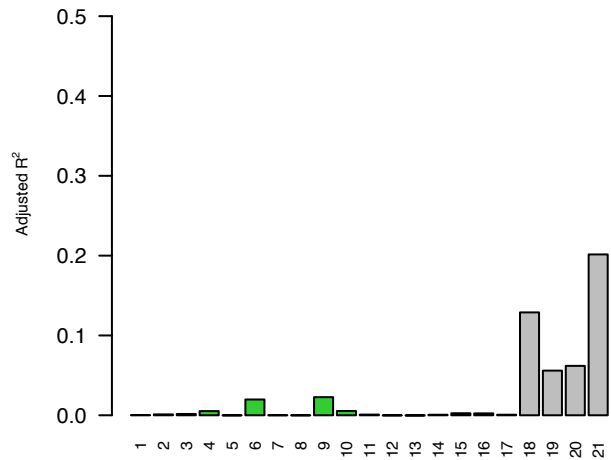**Grigul**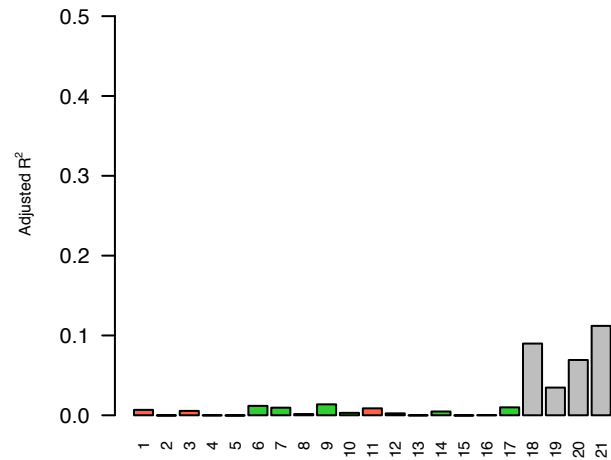**Shalem**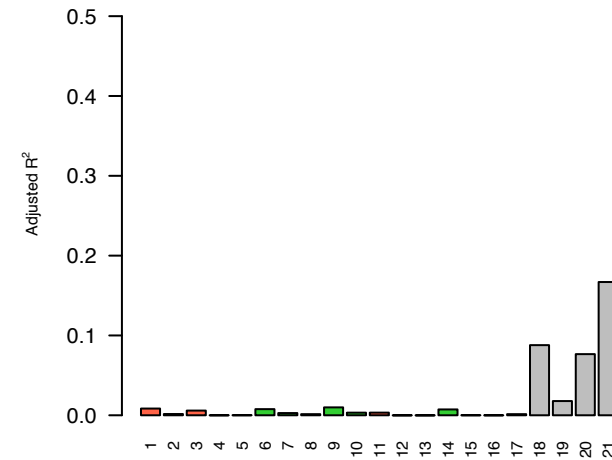**Presnyak**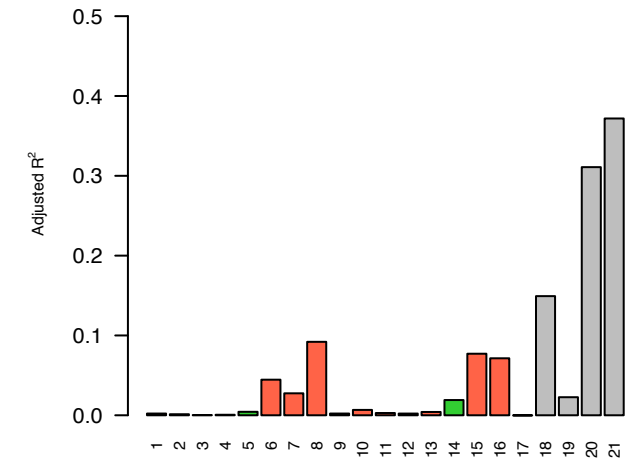

**Figure S1.** Multiple predictors best explain variation in mRNA degradation. We show the adjusted R2 for individual predictors in each model. Predictors are as follows: 1=Coding length, 2=3'UTR length, 3=5'UTR length, 4=5'UTR GC content, 5=3'UTR GC content, 6=mRNA abundance, 7=Protein per cell, 8=Ribosome density, 9=Transcription rate, 10=GC1, 11=GC2, 12=GC3, 13=Protein half-life, 14=deltaG, 15=CAI, 16=nTE, 17=Protein per mRNA, 18=GO, 19=RNABP, 20=model with continuous variables, and 21=model with continuous variables +GO +RNABP.
